# Supplementary material for: Oxide removal and stabilization of bismuth thin films through chemically bound thiol layers
Source: PubMed Central journal article supplement — RSC Adv. 2018 Sep 27;8(58):33368–73. doi: 10.1039/c8ra06840b (PMC9086459; doi:10.1039/c8ra06840b), 2018-09-27
Supplement: RA-008-C8RA06840B-s001.pdf [file RA-008-C8RA06840B-s001.pdf]

Supporting Information

# Oxide removal and stabilization of bismuth thin films through chemically bound thiol layers

*Giuseppe Alessio Verni<sup>†,+,§</sup>, Brenda Long<sup>†,+,§\*</sup>, Farzan Gity<sup>+</sup>,*

*Martin Lanius<sup>c</sup>, Peter Schüffelgen<sup>c</sup>, Gregor Mussler<sup>c</sup>, Detlev Grützmacher<sup>c</sup>, Jim Greer<sup>+‡</sup>*

*and Justin D. Holmes<sup>†, +, §</sup>*

<sup>†</sup>School of Chemistry, University College Cork, Cork, T12 P2FY, Ireland. <sup>+</sup>Tyndall National Institute, University College Cork, Cork, T12 PX46, Ireland. <sup>§</sup>AMBER@CRANN, Trinity College Dublin, Dublin 2, Ireland. <sup>c</sup>Peter Grünberg Institute 9 & Jülich Aachen Research Alliance (JARA-FIT), Research Center Jülich, Germany. <sup>‡</sup>Faculty of Science and Engineering, University of Nottingham Ningbo China, Ningbo, China

**Table S1.** Percentages of the elemental Bi and Bi-X components for the Bi *4f* core level XPS scans acquired on the samples

| Sample                          | Bi <i>4f</i> <sub>5/2</sub> | Bi <i>4f</i> <sub>7/2</sub> | BiX <i>4f</i> <sub>5/2</sub> | BiX <i>4f</i> <sub>7/2</sub> |
|---------------------------------|-----------------------------|-----------------------------|------------------------------|------------------------------|
| Wafer as rec.                   | 23.5                        |                             | 76.5                         |                              |
| Wafer + 1 mM thiol solution     | 28.0                        |                             | 72.0                         |                              |
| Wafer + 10 mM thiol solution    | 59.1                        |                             | 40.9                         |                              |
| Wafer + 100 mM thiol solution   | 64.9                        |                             | 35.1                         |                              |
| Wafer + 100 mM thiol + air exp. | 57.5                        |                             | 42.5                         |                              |
| Powder as rec.                  | 23.5                        |                             | 76.5                         |                              |
| Powder + 100 mM                 | 45.6                        |                             | 54.4                         |                              |

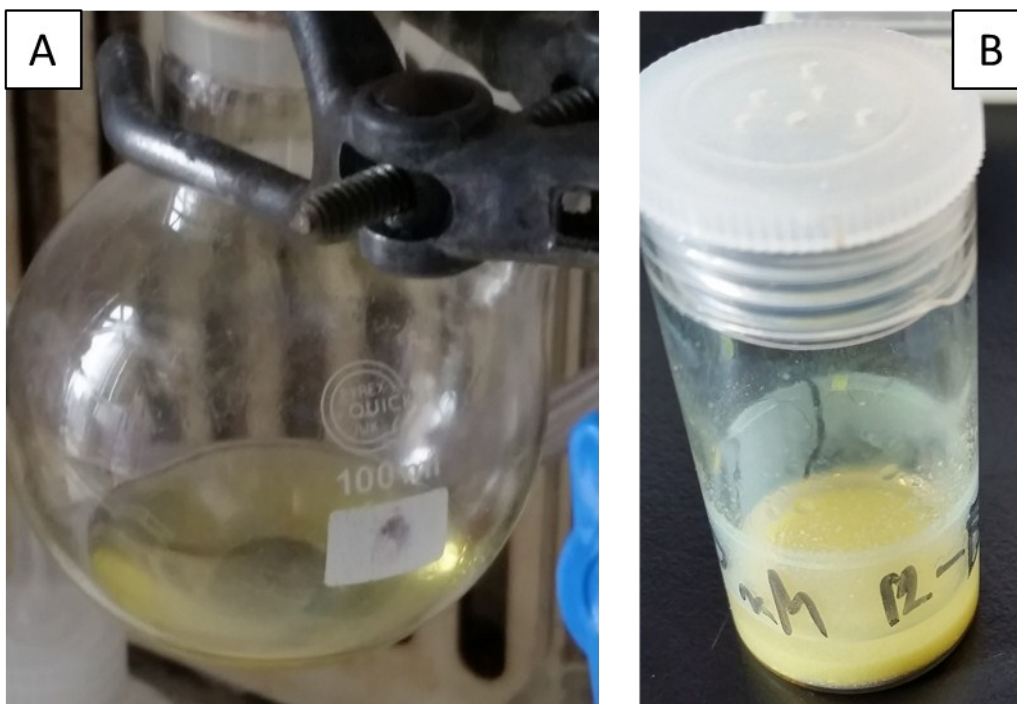

**Figure S1.** Pictures of (a) Flask under  $N_2$  containing powder and a 100 mM solution of 1-dodecanethiol in IPA and (b) vial in air containing powder and 100 mM solution of 1-dodecanethiol in IPA. Note in both cases the colour of the solution turning yellow.

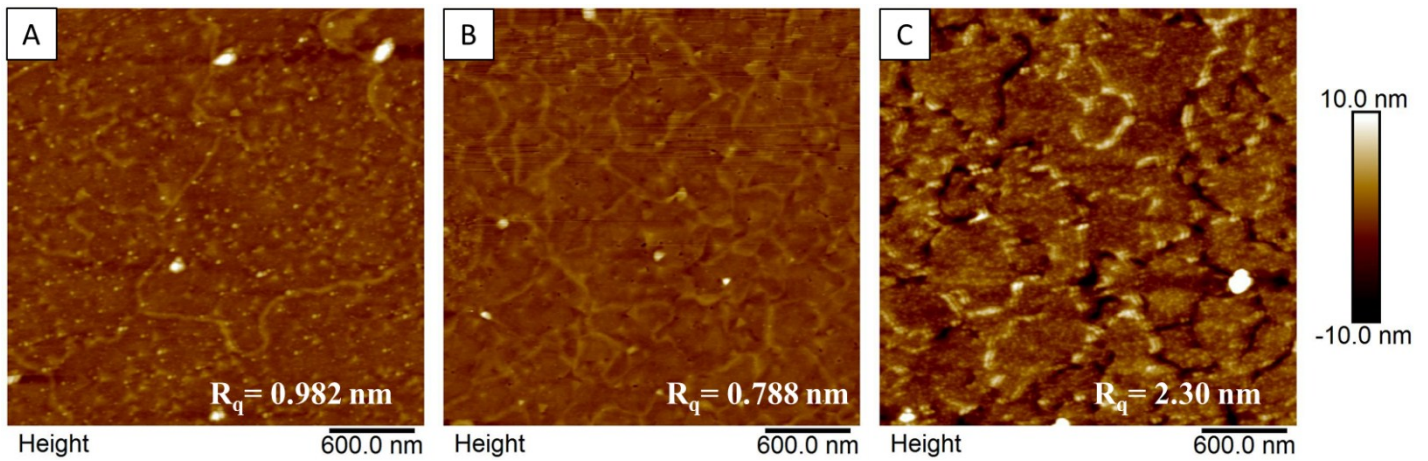

**Figure S2.** AFM images and RMS roughness values of (a) as received Bi film on Si, (b) Bi film after annealing at 180 °C for 3 hours, (c) annealed Bi surface after functionalisation with 1-dodecanethiol. Note in image (c) the non-continuity of the film which causes some areas of the wafer to reoxidise.

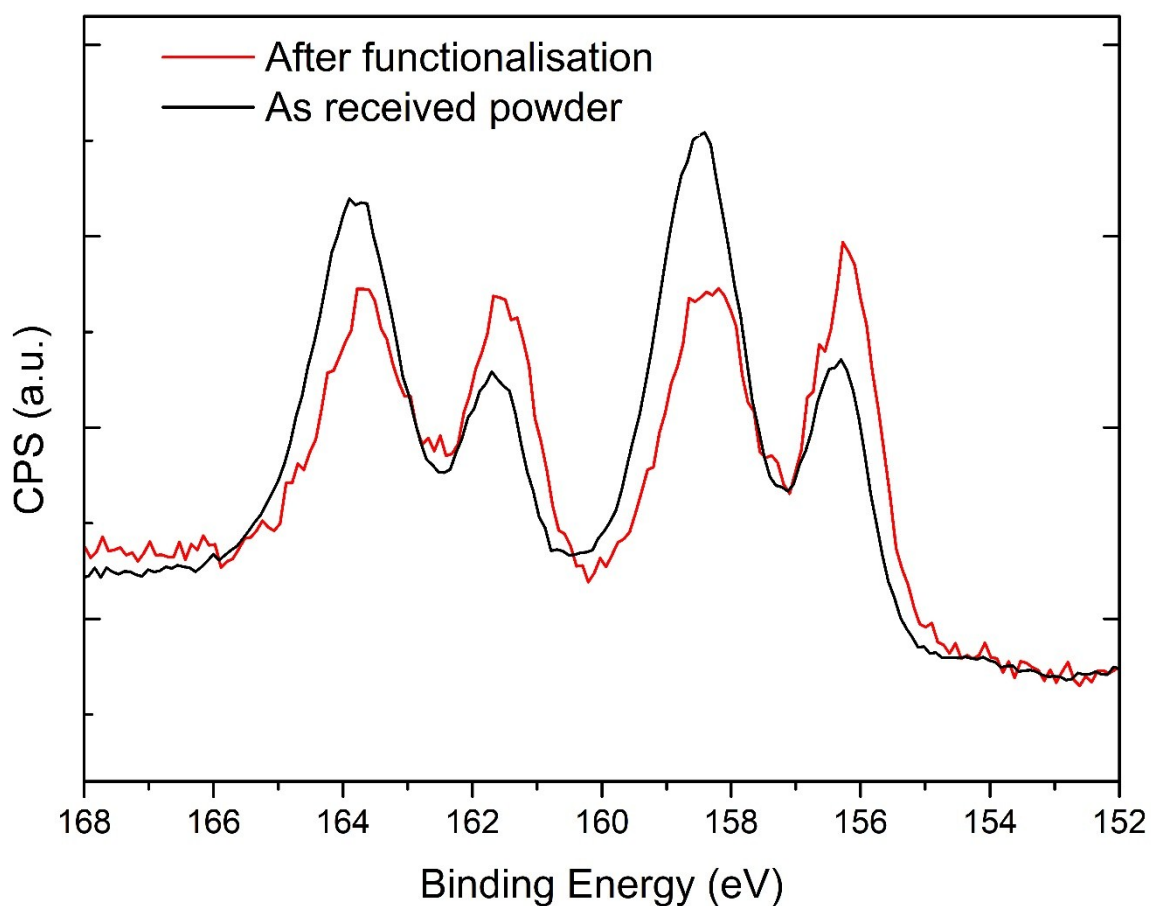

**Figure S3.** Overlaid XPS spectra of Bi *4f* core level of Bi powder before and after reaction with 1-dodecanethiol solution in IPA at 100 mM concentration. Graphs have been normalised to the minimum of the as received sample to underline the oxide reduction effect.
